# Supplementary material for: Genome-wide identification of Hami melon miRNAs with putative roles during fruit development
Source: PubMed Central journal article supplement (PMC5524408; doi:10.1371/journal.pone.0180600), 2017-07-24

S1 Fig

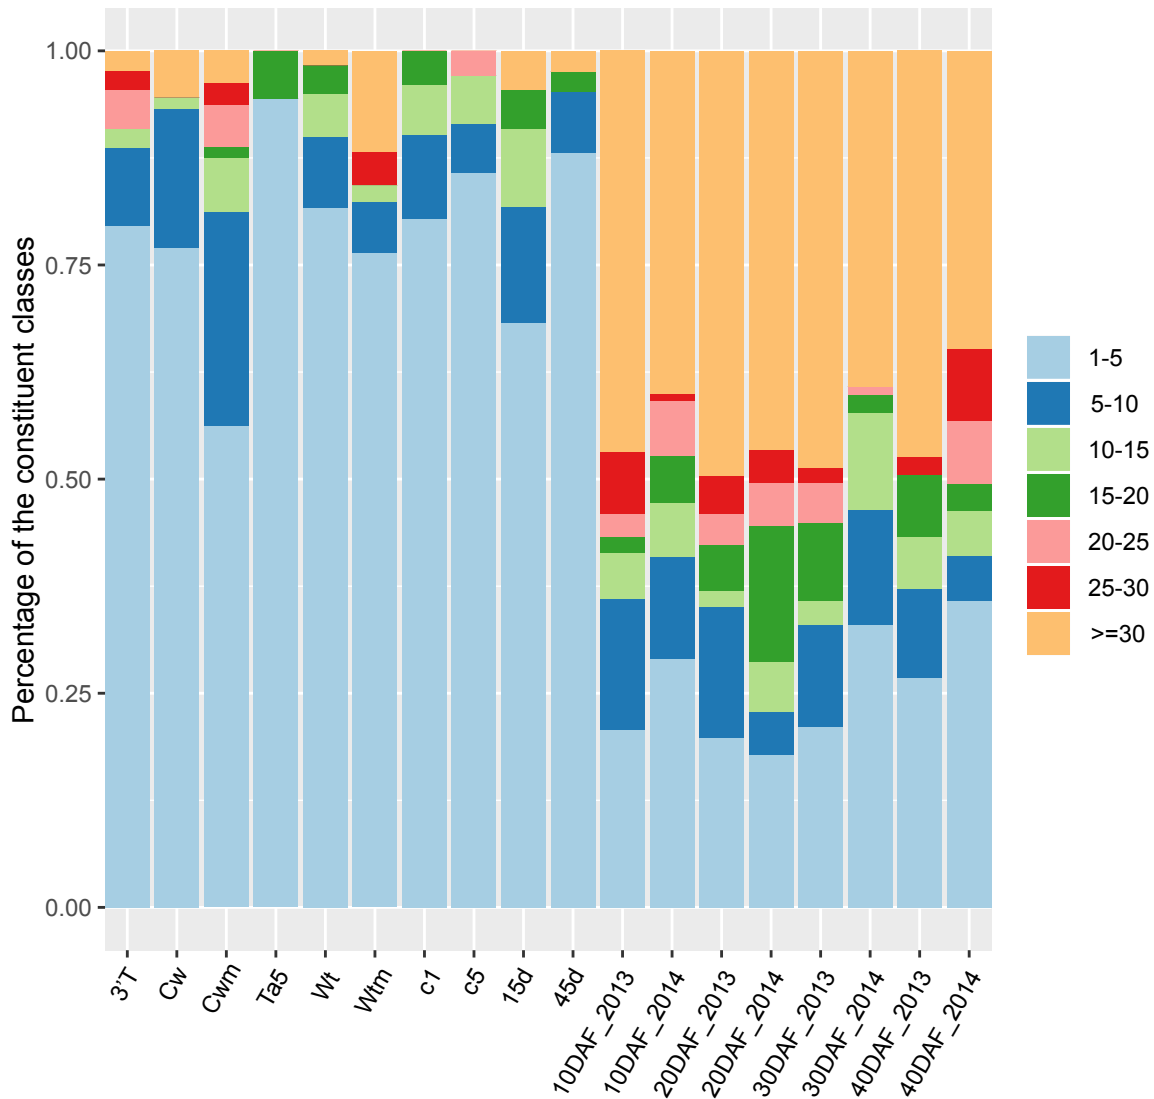

Supplement: pone.0180600.s001.pdf [file pone.0180600.s001.pdf]
