# Supplementary material for: Genome-wide identification of Hami melon miRNAs with putative roles during fruit development
Source: PubMed Central journal article supplement (PMC5524408; doi:10.1371/journal.pone.0180600), 2017-07-24
Supplement: pone.0180600.s002.pdf [file pone.0180600.s002.pdf]

S2 Fig

Others

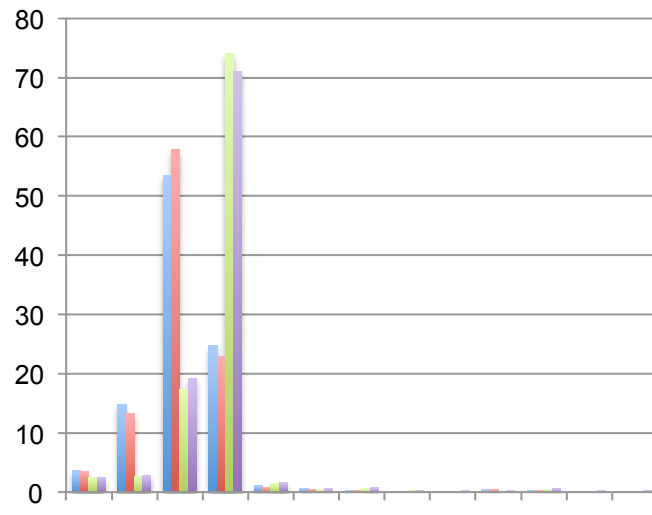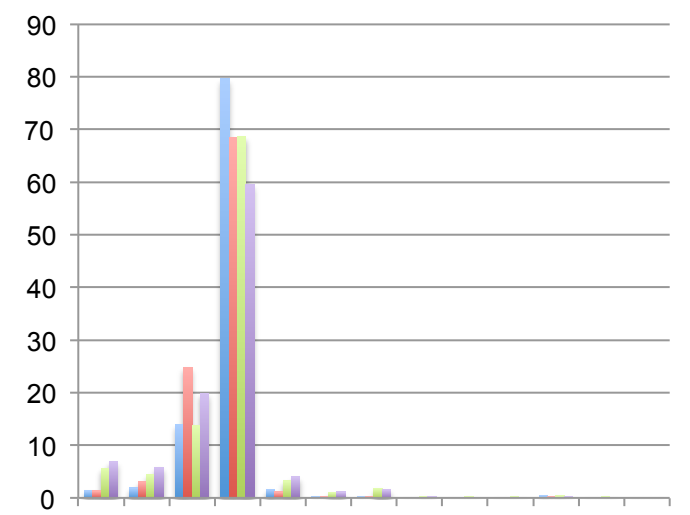

miRNA

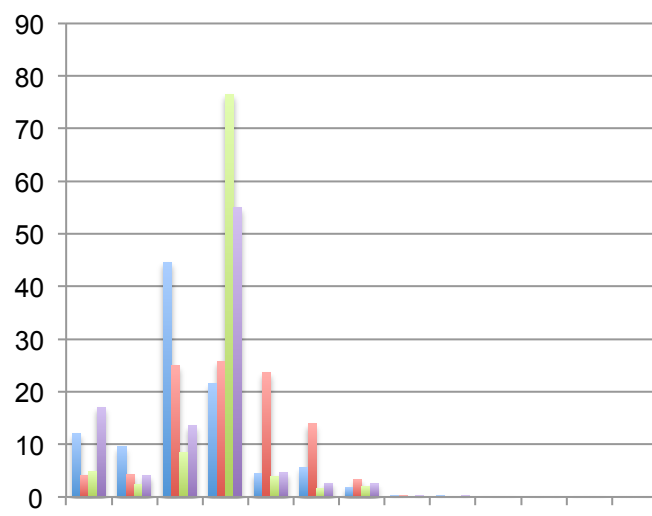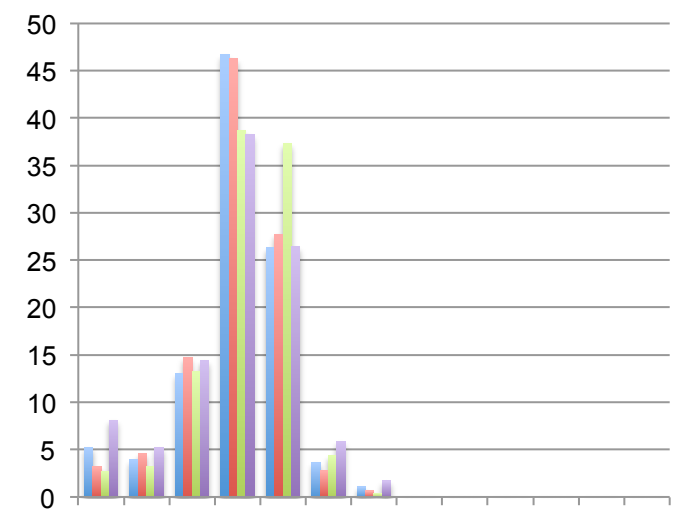

rRNA

Percentage of sequence frequency

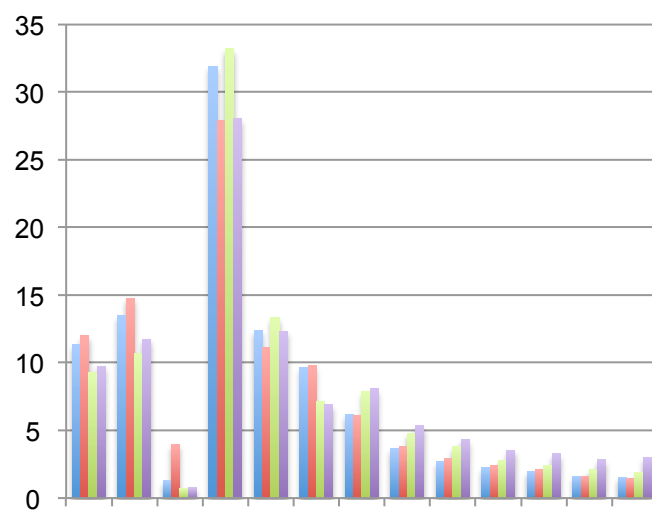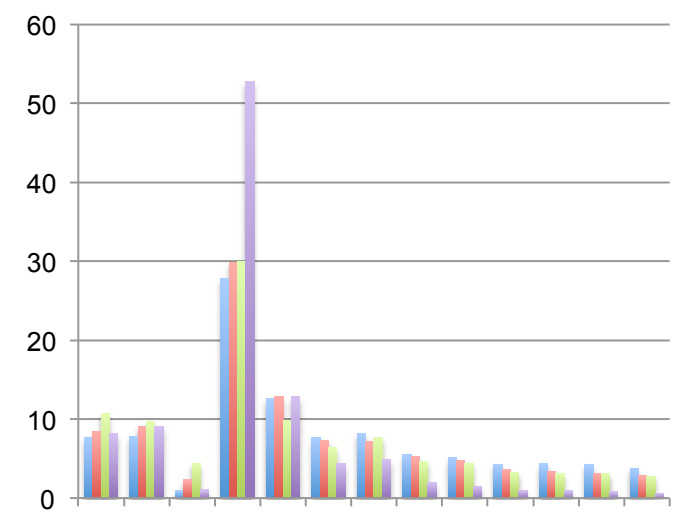

tRNA

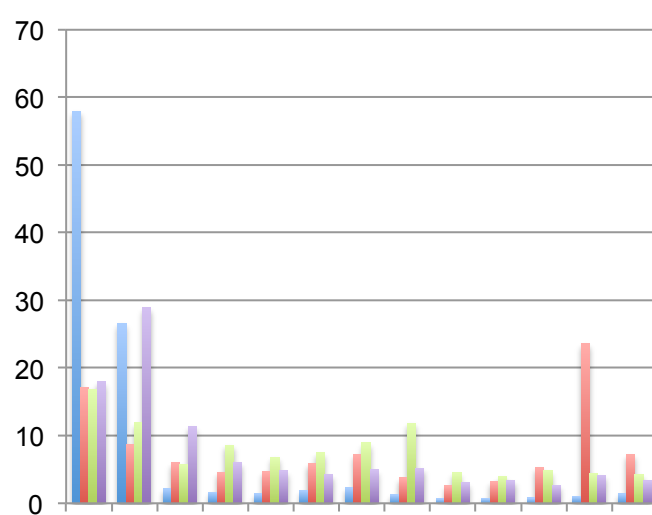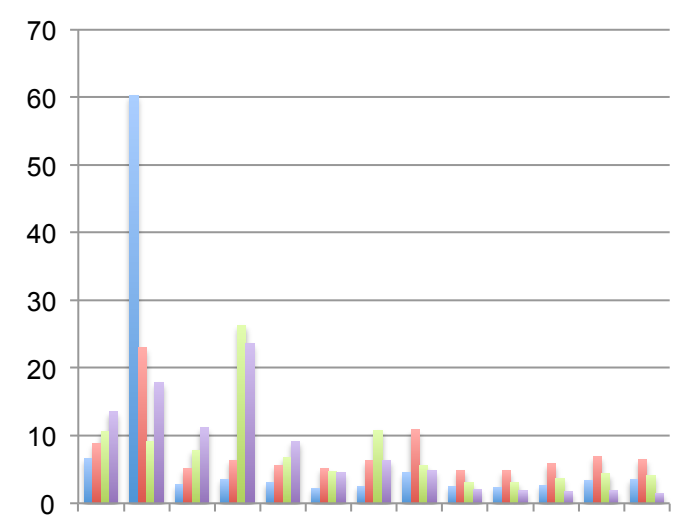

Unannotated

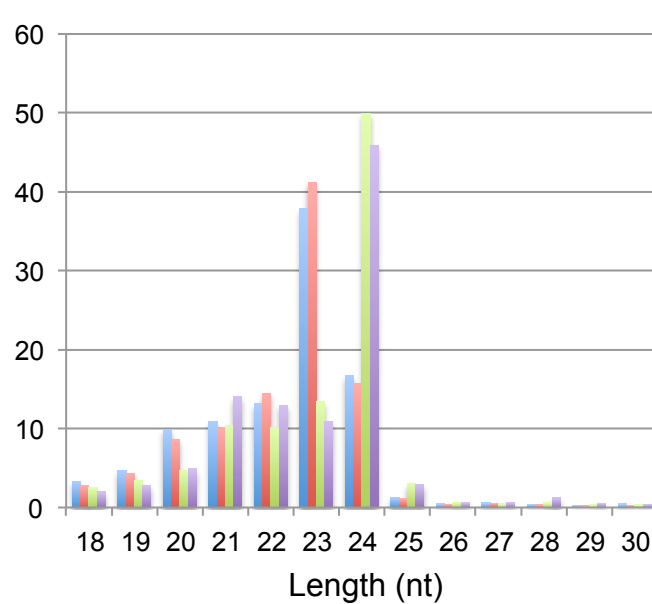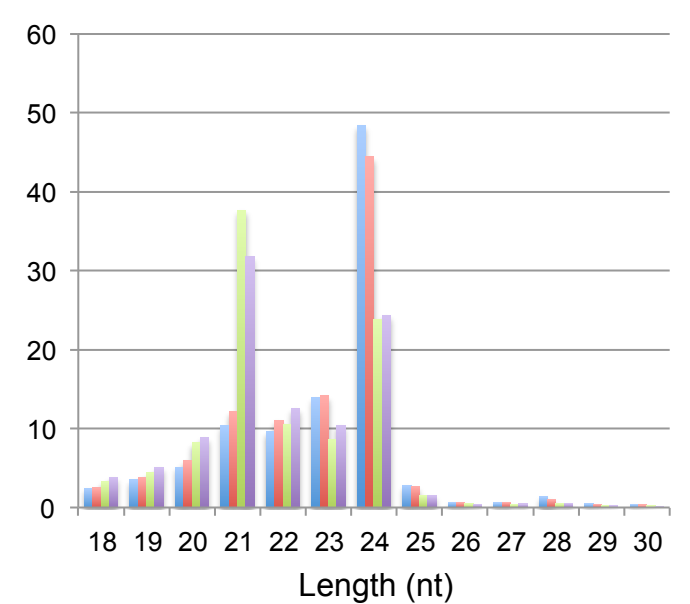

10DAF\_2013 20DAF\_2013 30DAF\_2013 40DAF\_2013

10DAF\_2014 20DAF\_2014 30DAF\_2014 40DAF\_2014
