# Supplementary material for: Genome-wide identification of Hami melon miRNAs with putative roles during fruit development
Source: PubMed Central journal article supplement (PMC5524408; doi:10.1371/journal.pone.0180600), 2017-07-24
Supplement: pone.0180600.s003.pdf [file pone.0180600.s003.pdf]

S3 Fig

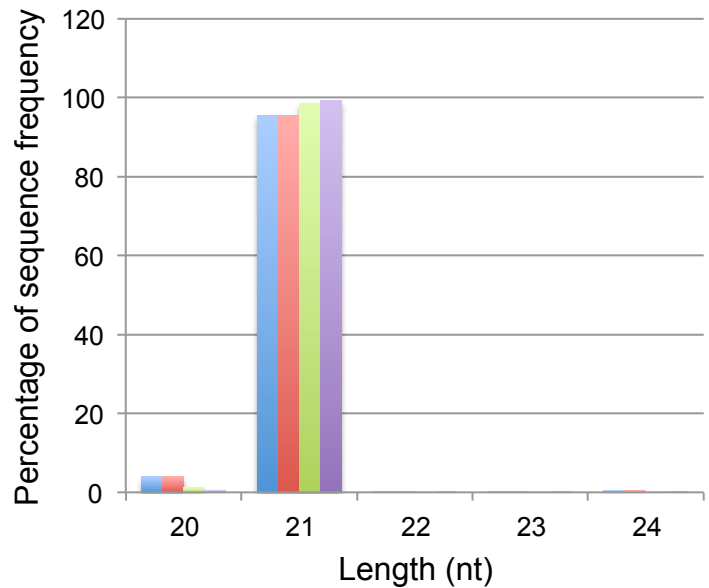

10DAF\_2013  
20DAF\_2013  
30DAF\_2013  
40DAF\_2013

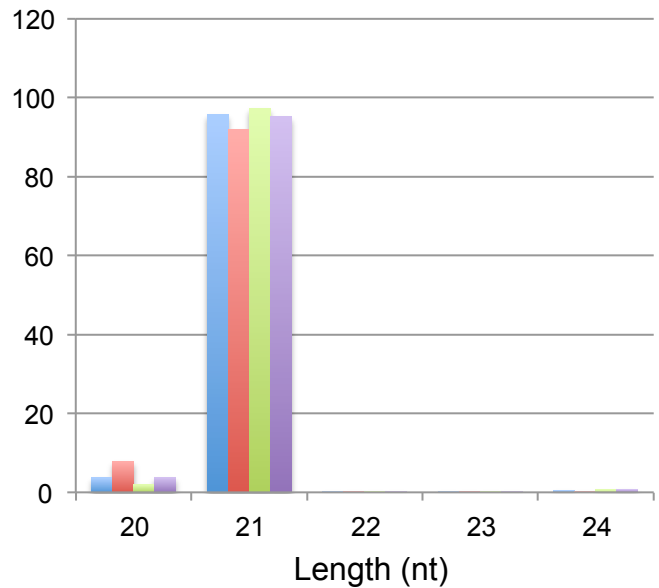

10DAF\_2014  
20DAF\_2014  
30DAF\_2014  
40DAF\_2014

S3 Fig

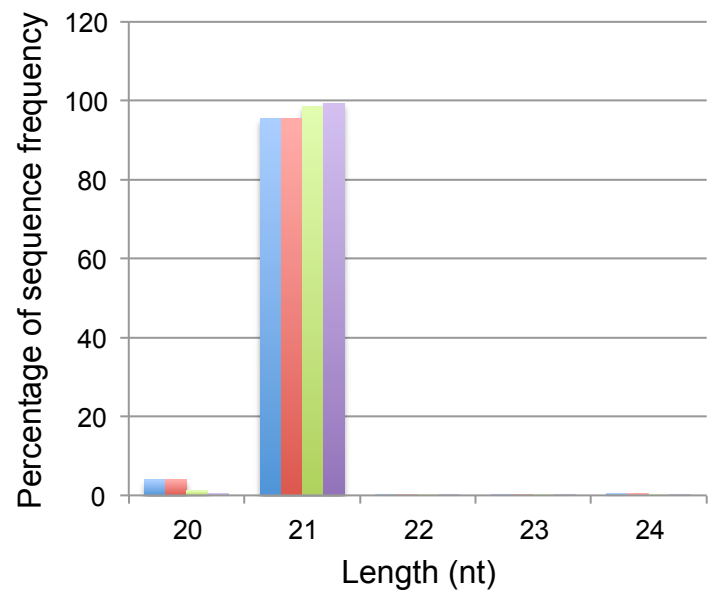

- 10DAF\_2013
- 20DAF\_2013
- 30DAF\_2013
- 40DAF\_2013

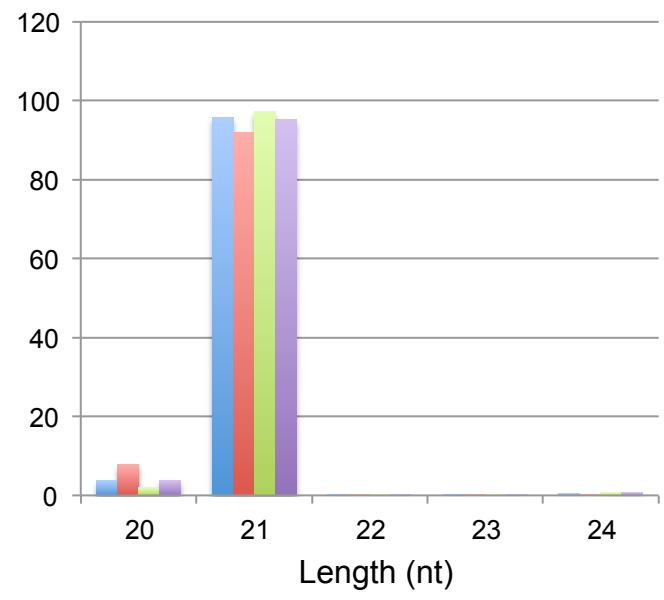

- 10DAF\_2014
- 20DAF\_2014
- 30DAF\_2014
- 40DAF\_2014
