# Supplementary material for: Genome-wide identification of Hami melon miRNAs with putative roles during fruit development
Source: PubMed Central journal article supplement (PMC5524408; doi:10.1371/journal.pone.0180600), 2017-07-24
Supplement: pone.0180600.s004.pdf [file pone.0180600.s004.pdf]

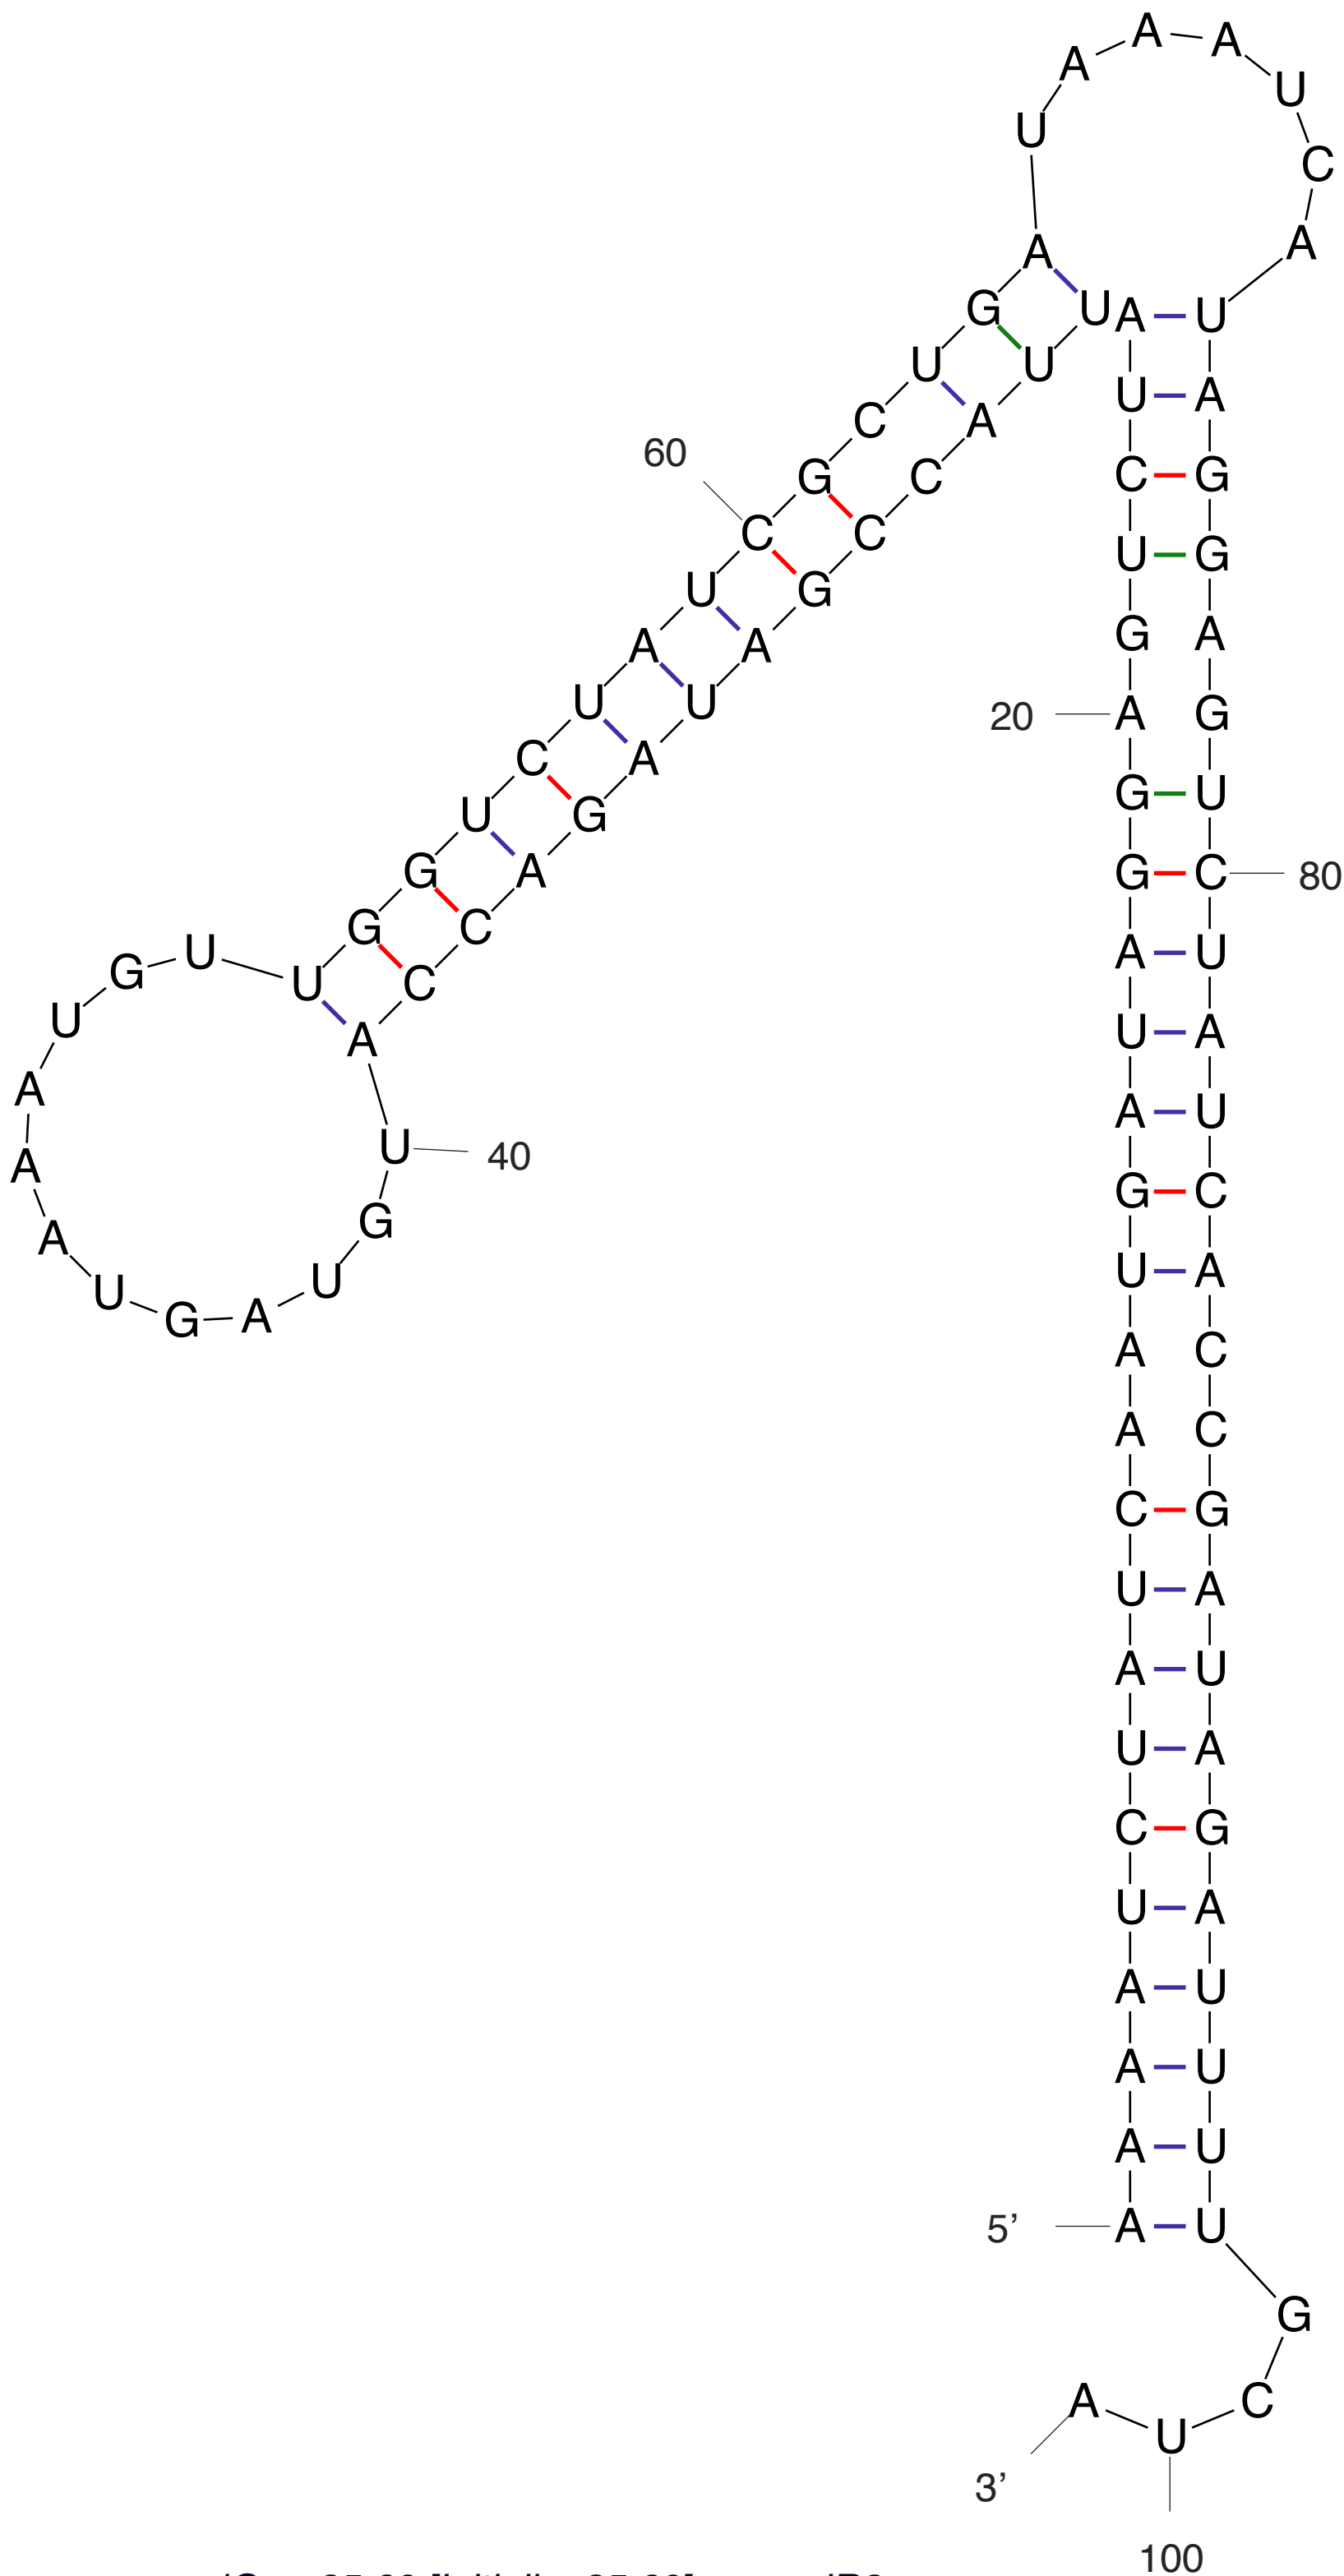

$dG = -35.60$  [Initially -35.60] *cme-miR3*





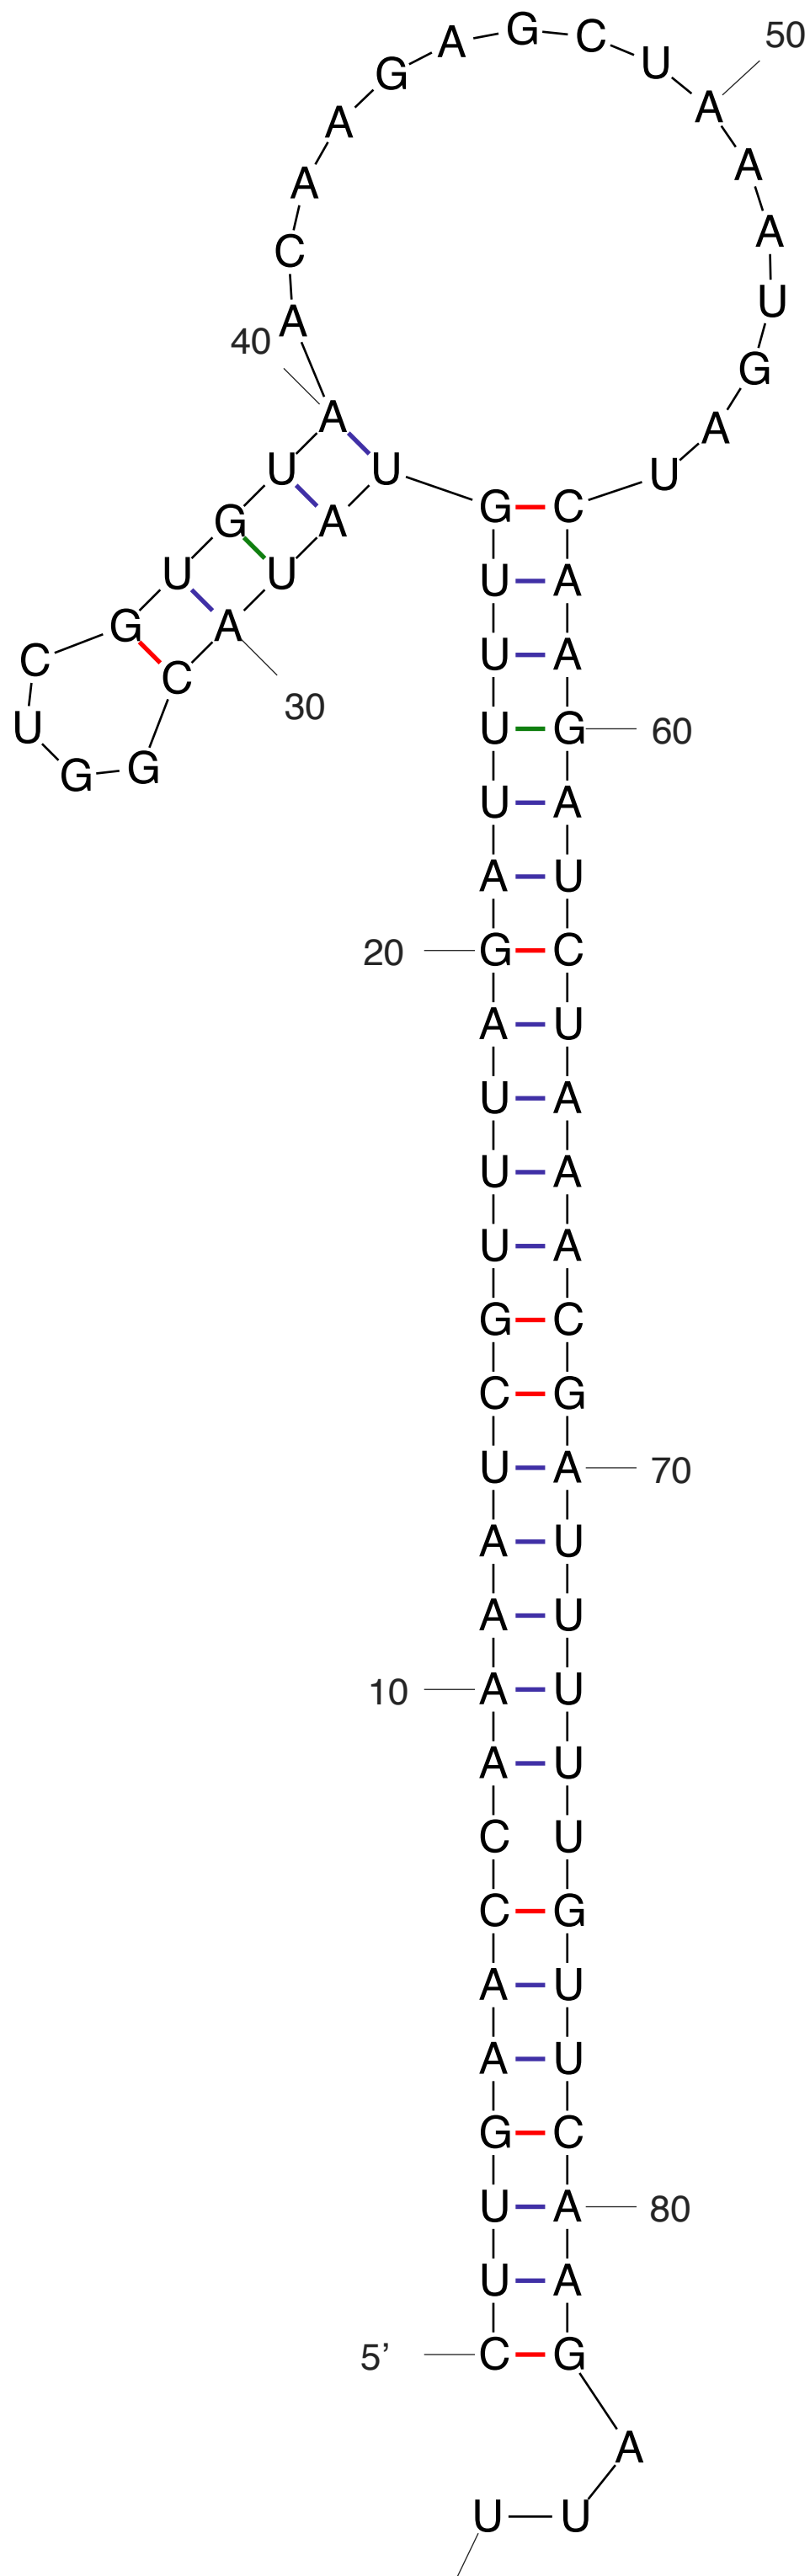

$dG = -31.40$  [Initially  $-31.40$ ] *cme-miR6*

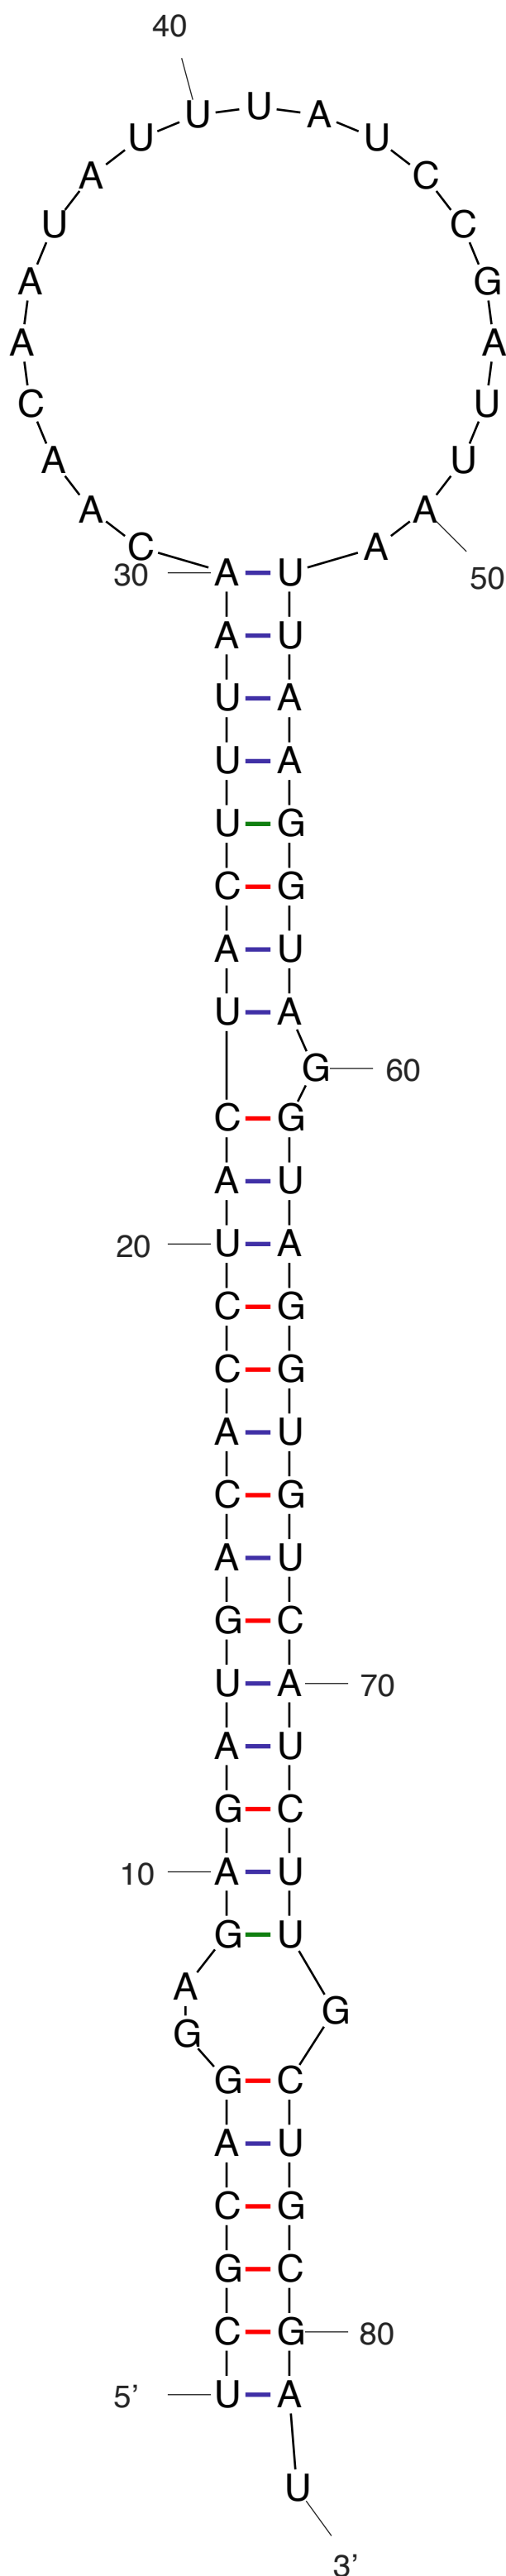

$dG = -38.10$  [Initially -38.10] *cme-miR7*
